1

2

3

4

5 **The *Drosophila* mitochondrial citrate carrier regulates L-2-hydroxyglutarate accumulation**  
6 **by coupling the tricarboxylic acid cycle with glycolysis**

7

8 Hongde Li<sup>1</sup>, Alexander J. Hurlburt<sup>1</sup>, and Jason M. Tennessen<sup>1,\*</sup>

9

10 <sup>1</sup>Department of Biology, Indiana University, 1001 East Third Street, Bloomington, IN 47405,  
11 USA

12 \*Corresponding Author: Jason M. Tennessen

13 Email: [jtenness@indiana.edu](mailto:jtenness@indiana.edu)

14 Tel: (812)-855-9803

15 **Key words:** 2-hydroxyglutarate; mitochondrial citrate carrier; *SLC25A1*; *L2HGDH*;  
16 2-hydroxyglutaric aciduria; *Drosophila*

17 **Running title:** *Sea/SLC25A1* and 2-hydroxyglutarate

18

19 **Abstract**

20 The oncometabolites D- and L-2-hydroxyglutarate (2HG) broadly interfere with cellular  
21 metabolism, physiology, and gene expression. A key regulator of 2HG metabolism is the  
22 mitochondrial citrate carrier (CIC), which, when mutated, promotes excess D-/L-2HG  
23 accumulation. The mechanism by which CIC influences 2HG levels, however, remains unknown.  
24 Here we studied the *Drosophila* gene *scheggia* (*sea*), which encodes the fly CIC homolog, to  
25 explore the mechanisms linking mitochondrial citrate efflux to L-2HG metabolism. Our findings  
26 demonstrate that decreased *Drosophila* CIC activity results in elevated glucose catabolism and  
27 increased lactate production, thereby creating a metabolic environment that inhibits L-2HG  
28 degradation.

29

## 30 **Introduction**

31       The enantiomers of 2-hydroxyglutarate (2HG) have emerged as potent regulators of  
32 metabolism, chromatin architecture, and cell fate decisions (Losman and Kaelin 2013; Ye et al.  
33 2018). While these compounds are commonly associated with cancer metabolism and often  
34 referred to as oncometabolites, neither D-2HG nor L-2HG are tumor specific. Humans produce  
35 D-2HG as the result of  $\gamma$ -hydroxybutyrate metabolism and phosphoglycerate dehydrogenase  
36 activity (Struys et al. 2005b; Fan et al. 2015), while L-2HG is generated by malate  
37 dehydrogenase and lactate dehydrogenase A (LDHA) in response to hypoxia, acidic cellular  
38 conditions, and decreased electron transport chain (ETC) activity (Mullen et al. 2011; Reinecke  
39 et al. 2012; Intlekofer et al. 2015; Oldham et al. 2015; Nadtochiy et al. 2016; Teng et al. 2016;  
40 Intlekofer et al. 2017). Furthermore, both yeast and *Drosophila* generate D-2HG and L-2HG  
41 under standard growth conditions, respectively (Becker-Kettern et al. 2016; Li et al. 2017),  
42 suggesting that these molecules serve endogenous biological functions and emphasizing the need  
43 to understand how 2HG metabolism is controlled *in vivo*.

44       Despite the fact that D- and L-2HG dramatically influence cellular physiology, the molecular  
45 mechanisms that regulate 2HG accumulation in healthy cells remain poorly understood. In fact,  
46 most of our current understanding about endogenous D- and L-2HG metabolism stems from a  
47 class of rare human diseases that are collectively known as the 2HG acidurias (2HGAs,  
48 Kranendijk et al. 2012). For example, patients with L2HGA accumulate L-2HG due to  
49 loss-of-function mutations in the FAD<sup>+</sup>-dependent enzyme L-2HG dehydrogenase (L2HGDH)  
50 (Rzem et al. 2004), which converts L-2HG to 2-oxoglutarate (2OG). Similarly, D2HGA type I

51 results from the absence of D-2HG dehydrogenase (D2HGDH) activity and an inability to  
52 degrade D-2HG (Struys et al. 2005a). Overall, these studies illustrate how the 2HGA disorders  
53 provide essential clues for understanding endogenous 2HG metabolism.

54 In addition to the disorders associated with a single 2HG enantiomer, a small subset of  
55 2HGA patients exhibit elevated levels of both D-2HG and L-2HG. This rare disease, which is  
56 known as combined D-/L-2HGA, results in severe neurological and muscular defects,  
57 developmental delays, and childhood lethality (Muntau et al. 2000). Intriguingly, combined  
58 D-/L-2HGA results from loss-of-function mutations in *SLC25A1* (Nota et al. 2013), which  
59 encodes a mitochondrial citrate carrier (CIC) that mediates the transport of citrate across the  
60 mitochondrial inner membrane (Palmieri 2013). Based on both the metabolic profile of  
61 combined D-/L-2HGA patients and stable-isotope tracer studies of CIC-deficient cells, this  
62 transporter coordinates the tricarboxylic acid (TCA) cycle flux with lipogenesis and cellular  
63 redox balance (Mullen et al. 2011; Jiang et al. 2017). The mechanism by which CIC influences  
64 D-2HG and L-2HG accumulation, however, remains largely unknown.

65 We recently discovered that *Drosophila* larvae accumulate high concentrations of L-2HG  
66 during normal larval growth (Li et al. 2017). Subsequent analysis revealed that larvae rely on the  
67 *Drosophila* LDH homolog (dLDH) to synthesize L-2HG from the TCA cycle intermediate  
68 2-oxoglutarate (2OG) (Li et al. 2017). Considering that human LDHA also synthesizes L-2HG  
69 (Intlekofer et al. 2015; Nadtochiy et al. 2016; Teng et al. 2016; Intlekofer et al. 2017), our earlier  
70 study indicates that *Drosophila* is well suited to explore the basic metabolic mechanisms that  
71 control L-2HG accumulation. Here we exploit the fly system to investigate the metabolic link

72 between CIC activity and L-2HG. By studying a hypomorphic mutation in the *Drosophila* gene  
73 *scheggia* (*sea*), which encodes the fly *SLC25A1* homolog (Carrisi et al. 2008; Morciano et al.  
74 2009), we demonstrate that loss of mitochondrial citrate efflux results in elevated glucose  
75 catabolism, increased lactate production, and enhanced L-2HG accumulation. The dramatic  
76 increase in L-2HG levels, however, primarily result from decreased degradation, as the increase  
77 in lactate concentration inhibits dL2HGDH activity and stabilizes the L-2HG pool. Overall, our  
78 study reveals a mechanism by which a well-described metabolic feedback loop unexpectedly  
79 controls L-2HG degradation.

80

## 81 **Results and Discussion**

### 82 *L-2HG levels are increased in sea mutants*

83 To determine if the *Drosophila* homolog of *SLC25A1* influences D-2HG and L-2HG  
84 accumulation, we used gas chromatography-mass spectrometry (GC-MS) to quantify the 2HG  
85 enantiomers in *sea* mutant larvae (*sea*<sup>Δ24</sup>/*Df*) and genetically matched heterozygous controls  
86 (*sea*<sup>PreC</sup>/*Df*). Our analysis revealed that both D- and L-2HG are significantly elevated in *sea*  
87 mutants (Fig. 1A,B), with L-2HG representing the majority of the 2HG pool within *sea*<sup>Δ24</sup>/*Df*  
88 larvae. While these observations differ from combined D-/L-2HGA patients, where D-2HG is the  
89 more abundant enantiomer (Muntau et al. 2000), the metabolic profile of *sea*<sup>Δ24</sup>/*Df* mutants  
90 clearly indicates that the inverse relationship between CIC activity and L-2HG accumulation is  
91 present in flies.

92

93 *sea* mutants and combined D-/L-2HGA patients exhibit a similar metabolic profile

94 Combined D-/L-2HGA patients not only exhibit increased 2HG levels and decreased citrate  
95 accumulation, but also possess elevated levels of lactate, 2OG, succinate, fumarate, and malate  
96 (Nota et al. 2013; Prasun et al. 2015). To determine if *sea* mutants exhibit similar metabolic  
97 defects, we used a GC-MS-based approach to examine metabolites in glycolysis and the TCA  
98 cycle. Multivariate data analysis of the resulting datasets revealed that *sea*<sup>Δ24</sup>/*Df* mutant larvae  
99 exhibit a distinct metabolic profile when compared to either genetically-matched *sea*<sup>Pre</sup>/*Df*  
100 controls or *w*<sup>1118</sup>/*Df* controls (Fig. 1C; Supplemental Fig. S1A), demonstrating that the *sea*<sup>Δ24</sup>  
101 mutation significantly disrupts larval metabolism. Targeted analysis of these data revealed that  
102 *sea*<sup>Δ24</sup>/*Df* mutants display a metabolic profile that is reminiscent of combined D-/L-2HGA  
103 patients. Notably, mutant larvae exhibit decreased citrate levels and elevated amounts of  
104 pyruvate, lactate, fumarate, and malate (Fig. 1D; Supplemental Fig. S1B). Similar metabolic  
105 changes were observed when the *sea*<sup>Δ24</sup> mutation was analyzed in trans to a second deficiency  
106 that also uncovers the *sea* locus (Supplemental Fig. S2). Moreover, the *sea*<sup>Δ24</sup>/*Df* metabolic  
107 phenotypes were rescued by ubiquitous expression of a *UAS-sea* transgene, indicating that the  
108 metabolic profile displayed by *sea*<sup>Δ24</sup>/*Df* mutants specifically results from the loss of CIC activity  
109 (Supplemental Fig. S3A,B).

110

111 *sea* mutants exhibit elevated glycolytic flux

112 Considering that *Drosophila* larvae primarily synthesize L-2HG from glucose (Li et al.  
113 2017), our data suggest that the *sea*<sup>Δ24</sup>/*Df* metabolic profile results from elevated glycolytic flux.

114 We tested this hypothesis by feeding  $^{13}\text{C}_6$ -glucose to both  $sea^{\Delta 24}/Df$  mutants and  $sea^{prec}/Df$   
115 controls, and selectively monitoring  $^{13}\text{C}$  incorporation into lactate, pyruvate, citrate, and 2HG.  
116 When compared with  $sea^{prec}/Df$  controls,  $sea^{\Delta 24}/Df$  mutants exhibit a 60% increase in the rate of  
117 lactate (m+3) synthesis. Moreover, mutant larvae also exhibited a modest increase in the  
118 production of pyruvate (m+3) and 2HG (m+2), and a slight, but significant, decrease in the rate  
119 of m+2 citrate synthesis (Fig. 2). These observations confirm that glycolytic flux is elevated in  
120  $sea$  mutants and are consistent with a recent study that observed enhanced glucose consumption  
121 and increased lactate production in CIC-deficient human cells (Jiang et al. 2017).

122 The  $^{13}\text{C}$  tracer experiments raise the question of how *Drosophila* CIC activity antagonizes  
123 glucose catabolism and L-2HG accumulation. Since  $sea$  mutants exhibit significant changes in  
124 metabolites associated with histone modifications (*i.e.*, cytosolic citrate and L-2HG), we used  
125 RNA sequencing (RNA-seq) to determine if *Drosophila* CIC activity regulates the expression of  
126 glycolytic enzymes. When compared to  $sea^{prec}/Df$  controls,  $sea^{\Delta 24}/Df$  mutants exhibited  
127 significant changes in ~1,800 genes (fold change >2.0; p-value <0.01; Supplemental Table S1).  
128 However, out of 25 genes that encode glycolytic enzymes, the mRNA levels for 23 were either  
129 unchanged or slightly reduced in  $sea^{\Delta 24}/Df$  mutants (Supplemental Table S2). Moreover,  
130 *hexokinase C (Hex-C)* and *triose phosphate isomerase (Tpi)* were the only glycolytic genes that  
131 exhibited a >1.5-fold increase in  $sea^{\Delta 24}/Df$  mutants (no gene in this 25-gene subset exhibited a  
132 greater than a 2-fold increase). Similarly, qRT-PCR confirmed that *Pfk* mRNA levels were  
133 comparable between  $sea^{\Delta 24}/Df$  mutants and  $sea^{prec}/Df$  controls (Supplemental Figure S4).

134 Our gene expression studies suggest that CIC activity influences glycolytic enzyme activity

135 at a post-transcriptional level. Considering that citrate is a key allosteric regulator of  
136 phosphofructokinase (PFK) (Pogson and Randle 1966; Tornheim and Lowenstein 1976; Kemp  
137 and Foe 1983; Usenik and Legiša 2010), and that *sea* mutant cells exhibit a significant depletion  
138 of cytosolic citrate (Morciano et al. 2009), decreased *Drosophila* CIC activity would be expected  
139 to induce elevated glycolytic flux. Consistent with this possibility, *sea*<sup>Δ24</sup>/*Df* mutants that were  
140 fed a citrate-supplemented diet accumulated excess citrate and exhibited a significant decrease in  
141 pyruvate, lactate, and 2HG (Fig. 3A). Intriguingly, these results agree with the findings of a  
142 recent human case study, where a patient with a combined D-/L-2HGA exhibited decreased  
143 urinary 2HG levels and reduced cardiac symptoms following citrate treatment (Muhlhausen et al.  
144 2014).

145 The ability of exogenous citrate to reduce steady-state levels of pyruvate, lactate, and L-2HG  
146 supports a model in which *sea*<sup>Δ24</sup>/*Df* mutants accumulate excess L-2HG due to increased PFK  
147 activity. We further tested this hypothesis by using a *UAS-Pfk-RNAi* transgene to attenuate  
148 glycolysis in both control and *sea*<sup>Δ24</sup>/*Df* mutant larvae. Ubiquitous expression of this transgene in  
149 a wild-type background reduced *Pfk* mRNA levels by 80% and induced a similar reduction in  
150 pyruvate, lactate, and 2HG levels, thereby confirming previous observations that, in larvae, these  
151 compounds are largely derived from glucose (Supplemental Fig. S5). Similarly, *Pfk-RNAi*  
152 expression in a *sea*<sup>Δ24</sup>/*Df* mutant background induced an 80% decrease in *Pfk* mRNA levels, a 75%  
153 decrease in 2HG, and an ~50% decrease in pyruvate and lactate (Fig 3B and Supplemental Fig.  
154 S6). Overall, our experiments indicate that *sea* mutants accumulate excess L-2HG due to  
155 decreased cytosolic citrate levels, increased PFK activity, and elevated glycolytic flux.



156

157 *sea* mutants accumulate excess L-2HG due to decreased dL2HGDH activity

158 To understand how elevated glucose catabolism influences L-2HG metabolism, we used a  
159 genetic approach to determine if *sea* mutants display elevated L-2HG levels due to increased  
160 synthesis, decreased degradation, or a combination of both processes. We distinguished between  
161 these possibilities by measuring 2HG abundance in  $dL2HGDH^{12/14}; sea^{\Delta24}/Df$  double mutants,  
162 which are able to synthesize, but not degrade, L-2HG. If loss of CIC activity leads primarily to  
163 excess L-2HG synthesis, then  $dL2HGDH^{12/14}; sea^{\Delta24}/Df$  double mutants should accumulate more  
164 L-2HG than the  $dL2HGDH^{12/14}$  single mutant. In contrast, if *sea* mutants accumulate L-2HG due  
165 to decreased degradation, then L-2HG levels will be similar in both genetic backgrounds.  
166 GC-MS analysis revealed that double mutants harbored 2HG levels that were similar to those  
167 observed in single mutant controls (Fig. 4A), indicating that CIC activity primarily regulates  
168 L-2HG accumulation by controlling the degradation rate. In contrast,  $dL2HGDH^{12/14}; sea^{\Delta24}/Df$   
169 double mutant larvae exhibited increased levels of lactate and pyruvate, as well as decreased  
170 citrate levels (Fig. 4A), suggesting that dL2HGDH does not influence these aspects of the *sea*  
171 mutant phenotype.

172 Since we previously demonstrated that lactate production inhibits dL2HGDH activity and  
173 stabilizes the L-2HG pool (Li et al. 2017), our double mutant analysis hints at a model in which  
174  $sea^{\Delta24}/Df$  mutants accumulate excess L-2HG due to lactate-dependent dL2HGDH inhibition.  
175 Consistent with this possibility, qRT-PCR analysis revealed that *dL2HGDH* mRNA transcript  
176 levels are comparable between  $sea^{\Delta24}/Df$  mutants and  $sea^{Prec}/Df$  controls (Supplemental Fig. S7),

177 indicating that CIC activity influences dL2HGDH activity at a post-transcriptional level.  
178 Moreover, we noticed a significant positive correlation between lactate and 2HG levels in  
179 *sea*<sup>Δ24</sup>/*Df* mutants, *sea*<sup>Pre</sup>/*Df* controls, and *w*<sup>1118</sup>/*Df* controls ( $r = 0.973$ ,  $P < 0.01$ ; Fig. 4B,  
180 Supplemental Fig. S8). This observation suggests that lactate and L-2HG metabolism are  
181 coordinately regulated and supports a model in which elevated lactate levels stabilize the L-2HG  
182 pool. To directly test this hypothesis, we expressed a previously described *UAS-dLdh-RNAi*  
183 transgene in a *sea* mutant background. When compared with control strains, *dLdh-RNAi* induced  
184 an 80% decrease in *dLdh* mRNA levels and an ~60% reduction in both lactate and 2HG (Fig.  
185 4C,D). Overall, these results support a model in which *sea* mutants primarily accumulate L-2HG  
186 due to a lactate-dependent decrease in dL2HGDH activity.

187 Finally, we examined the possibility that reduced CIC activity enhances the ability of dLDH  
188 to synthesize L-2HG, which could account for the increased rate of L-2HG synthesis observed in  
189 the <sup>13</sup>C tracer experiments. qRT-PCR analysis revealed that *dLdh* gene expression is unchanged  
190 in *sea*<sup>Δ24</sup>/*Df* mutants (Supplemental Figure S9), suggesting that any increase in dLDH activity  
191 must occur at an enzymatic level. Considering that acidic environments enhance the ability of  
192 mammalian LDHA to synthesize L-2HG (Nadtochiy et al. 2016; Teng et al. 2016; Intlekofer et al.  
193 2017), the excess lactate present within *sea*<sup>Δ24</sup>/*Df* mutants might promote L-2HG synthesis by  
194 lowering the pH of larval tissues. In support of this hypothesis, acidic pH enhanced the ability of  
195 purified dLDH to catalyze the formation of L-2HG from 2-OG *in vitro* (Fig. 5, Supplemental Fig.  
196 S10), indicating that increased lactate production could promote L-2HG synthesis. Therefore,  
197 while decreased degradation appears to be the primary mechanism responsible for expansion of

198 the L-2HG pool in *sea* mutants, changes in intracellular pH might also contribute to this  
199 phenotype.

200

201 *L-2HG accumulation is coordinately regulated by glycolysis and the TCA cycle*

202 The CIC plays a central role in cellular metabolism by controlling the amount of citrate that  
203 exits the TCA cycle and enters the cytosol. This function serves many purposes in cellular  
204 physiology, such as providing substrate for fatty acid synthesis, controlling histone acetylation,  
205 and regulating cellular redox balance (Palmieri 2004; Morciano et al. 2009; Palmieri 2013; Dolce et al.  
206 2014). In addition, cytosolic citrate is an allosteric regulator of PFK, which represents one of  
207 three rate-limiting glycolytic enzymes (Pogson and Randle 1966; Tornheim and Lowenstein  
208 1976; Kemp and Foe 1983; Usenik and Legiša 2010). This feedback mechanism fine-tunes  
209 central carbon metabolism by serving as a signal to slow glycolysis during times of sufficient  
210 energy production. Our findings suggest that the role of citrate as an allosteric regulator of PFK  
211 represents the primary mechanism that induces L-2HG accumulation in *sea* mutants.

212 Based on both our study and previous observations in human cell culture (Jiang et al. 2017),  
213 CIC deficiency induces elevated glycolytic flux and decreased citrate production (see  
214 Supplemental Figure S11), thereby generating a cellular environment in which pyruvate levels  
215 rise due to both increased production and decreased TCA cycle utilization. As observed in  
216 *Drosophila*, human patients, and CIC-deficient cells (Nota et al. 2013; Prasun et al. 2015; Jiang  
217 et al. 2017; Li and Tennessen 2017), these metabolic disruptions result in enhanced lactate  
218 synthesis, which, at least in the fly, inhibits dL2HGDH and stabilizes the L-2HG pool. Such a

219 model would also explain why citrate treatment could reduce 2HG levels in a patient with  
220 combined D-/L-2HGA (Muhlhausen et al. 2014), as partial restoration of cytosolic citrate levels  
221 would inhibit PFK and reduce lactate production. In addition, our studies in *Drosophila* suggest  
222 that an LDH inhibitor, such as oxamate, could also alleviate some of the symptoms associated  
223 with combined D-/L-2HGA.

224 Our findings also highlight the role of dL2HGDH in controlling L-2HG accumulation.  
225 While dLDH synthesizes most of the larval L-2HG pool, the kinetics of this reaction are poor  
226 and the only reasonable explanation for how flies accumulate such high L-2HG levels rests upon  
227 our observations that dL2HGDH activity is sensitive to lactate (Li et al. 2017). Since larval  
228 metabolism is highly glycolytic, aerobic lactate production stabilizes the L-2HG pool and allows  
229 for dramatic accumulation of this metabolite. Whether this mechanism also functions in human  
230 cells warrants further examination, although the positive correlation between L-2HG and lactate  
231 has been repeatedly observed in mammals. Notably, elevated L-2HG levels are associated with  
232 increased lactate production in mouse CD8<sup>+</sup> T cells, human cells with disrupted 2OG metabolism,  
233 and in mammalian cells subjected to hypoxic conditions (Intlekofer et al. 2015; Oldham et al.  
234 2015; Burr et al. 2016; Tyrakis et al. 2016). Furthermore, we would also highlight a somewhat  
235 overlooked observation that mouse L2HGDH activity is inhibited by acidic pH (Nadtochiy et al.  
236 2016), suggesting that even if lactate doesn't directly regulate L-2HG degradation, excess lactate  
237 accumulation could establish a microenvironment that stabilizes the L-2HG pool. When  
238 considered in this context, our findings hint at a conserved feed-forward loop in animal  
239 metabolism that links lactate synthesis with L-2HG accumulation.

240 Finally, our study raises the question of why D-2HG levels remain low in *sea* mutants. After  
241 all, D-2HG levels exceed those of L-2HG in both combined D-/L-2HGA patients and  
242 CIC-deficient cells. While an adequate explanation requires a more detailed examination of  
243 *Drosophila* D-2HG metabolism, this discrepancy highlights a key difference between fly and  
244 human metabolism. Throughout our analyses, we repeatedly observed that flies accumulate  
245 minimal amounts of D-2HG, suggesting that the metabolic enzymes driving D-2HG  
246 accumulation in humans have either diverged in flies such that they no longer synthesize this  
247 molecule or that D-2HG is only produced under specific cellular conditions. When considered in  
248 light of these findings, our findings highlight the importance of L-2HG in cellular metabolism, as  
249 the mechanisms that control L-2HG accumulation are conserved across phyla. Moreover, these  
250 observations reinforce the notion that *Drosophila* genetics provides a powerful tool for dissecting  
251 the metabolic mechanisms that underlie L-2HG metabolism.

252

## 253 **Materials and Methods**

### 254 *Drosophila* husbandry and genetics

255 Fly stocks were maintained on standard Bloomington stock center media. Larvae were raised on  
256 molasses agar plates with yeast paste spread on the surface. Both the *sea* mutants (*sea*<sup>Δ24</sup>) and the  
257 precise excision control strain (*sea*<sup>Pre</sup>; previously noted as *Rev*<sup>24</sup>) were kindly provided by Dr.  
258 Giovanni Cenci (Morciano et al. 2009). All the experiments used a trans-heterozygous  
259 combination of *sea*<sup>Δ24</sup> and a molecularly-defined deficiency, and all controls consisted of a  
260 trans-heterozygous combination of *sea*<sup>Pre</sup> and the same molecularly-defined deficiency. A

261 complete list of BDSC stocks used in this study are available in Supplemental Table S3. The  
262 *UAS-sea* strain was generated by injecting the DGRC plasmid UFO06122 into BDSC Stock  
263 8621. *dL2HGDH* mutant strains are the same as reported previously (Li et al. 2017).

264

#### 265 *Metabolomics and metabolic flux analysis*

266 Middle third instar (mid-L3) larval samples were prepared and analyzed using GC-MS as  
267 described previously (Li et al. 2017). Spectral data preprocessing was performed using MetAlign  
268 software (Lommen 2009). For metabolic flux measurements, mid-L3 larvae were fed with  
269 Semi-defined Medium (Backhaus et al. 1984) containing 50% D-glucose-<sup>13</sup>C<sub>6</sub> for 2 hours, then  
270 metabolites were detected using GC-MS. The isotopologue distributions were corrected based on  
271 the natural abundance of elements. The metabolic flux  $f_x$  was estimated based on the formula  
272  $X^L/X^T = p(1 - \exp(-f_x * t/X^T))$ , where  $X^L$  is the amount of <sup>13</sup>C labeled metabolite,  $X^T$  is the amount of  
273 total metabolite pool,  $p$  is the percentage of glucose-<sup>13</sup>C<sub>6</sub>.

274

#### 275 *qRT-PCR*

276 Total RNAs were extracted using Trizol reagent (ThermoFisher Scientific). cDNA was made  
277 using Maxima First Strand cDNA Synthesis Kit (ThermoFisher Scientific), and qPCR was  
278 performed using FastStart Essential DNA Green Master Kit (Roche Diagnostics) in a  
279 LightCycler 96 instrument (Roche Diagnostics). The primers for *rp49* and *LDH* are the same as  
280 reported previously (Li et al. 2017). Additional primer sequences are described in Supplemental  
281 Table S4. mRNA levels were normalized to *rp49*.

282

283 *Enzyme activity assay*

284 *Drosophila* LDH was purified as described previously (Li et al. 2017). The assay was performed  
285 in 100 mM PBS at 25 °C with the indicated pH value. Each reaction contains 10 mM 2OG and 1  
286 mM NADH (Sigma-Aldrich). The values of OD<sub>340 nm</sub> were recorded by a Cytation 3 plate reader  
287 (BioTek).

288

289 *Statistical analysis*

290 Multivariate data analysis (principal component analysis, PCA) was performed using  
291 MetaboAnalyst (Xia and Wishart 2016). Unless noted, two-tailed Student's *t*-test was performed  
292 to do univariate statistical analysis and Bonferroni correction was used for multiple comparisons.

293

294 *RNA-seq analysis*

295 RNA was purified from staged mid-L3 larvae using a RNeasy Mini Kit (Qiagen). Sequencing  
296 was performed using an Illumina NextSeq500 platform with 75 bp sequencing module generating  
297 41 bp paired-end reads. After the sequencing run, demultiplexing with performed with bcl2fastq  
298 v2.20.0.422. All files were trimmed using cutadapt v1.12 with the parameters: "-a  
299 AGATCGGAAGAGC -m 30 -q 30" (Martin 2011). Remaining read pairs were mapped against  
300 Flybase 6.19 using hisat2 v2.1.0 with "--no-unal --no-mixed" parameters (Kim et al. 2015). Gene  
301 counts were produced using HTseq-Count v0.9.0 (Anders et al. 2015). The R package DESeq2  
302 was used to identify the differentially expressed genes (Love et al. 2014).

## 303 **Acknowledgments**

304 We thank the Bloomington *Drosophila* Stock Center, the *Drosophila* Genomics Resource  
305 Center, Flybase, and Center for Genomics and Bioinformatics at Indiana University. We also  
306 thank Dr. Giovanni Cenci (University of Rome) for strains and helpful advice. This project was  
307 supported by an Indiana CTSI award, which was funded in part by NIH grant UL1TR001108.  
308 J.M.T. is supported by NIH R35 Maximizing Investigators' Research Award 1R35GM119557.

309 Author Contributions: H.L. and J.M.T. designed this study, wrote the manuscript, and  
310 generated figures. H.L. and A.J.H. generated reagents and conducted the experiments.

311

## 312 **References**

- 313 Anders S, Pyl PT, Huber W. 2015. HTSeq--a Python framework to work with high-throughput sequencing data.  
314 *Bioinformatics* **31**: 166-169.
- 315 Backhaus B, Sulkowski E, Schlote F. 1984. A semi-synthetic, general-purpose medium for *Drosophila melanogaster*.  
316 *Dros Inf Serv* **60**: 210-212.
- 317 Becker-Ketterer J, Paczia N, Conrotte JF, Kay DP, Guignard C, Jung PP, Linster CL. 2016. *Saccharomyces cerevisiae*  
318 Forms D-2-Hydroxyglutarate and Couples Its Degradation to D-Lactate Formation via a Cytosolic  
319 Transhydrogenase. *The Journal of biological chemistry* **291**: 6036-6058.
- 320 Burr SP, Costa AS, Grice GL, Timms RT, Lobb IT, Freisinger P, Dodd RB, Dougan G, Lehner PJ, Frezza C et al. 2016.  
321 Mitochondrial Protein Lipoylation and the 2-Oxoglutarate Dehydrogenase Complex Controls HIF1alpha  
322 Stability in Aerobic Conditions. *Cell Metabolism* **24**: 740-752.
- 323 Carrisi C, Madeo M, Morciano P, Dolce V, Cenci G, Cappello AR, Mazzeo G, Iacopetta D, Capobianco L. 2008.  
324 Identification of the *Drosophila melanogaster* mitochondrial citrate carrier: Bacterial expression,  
325 reconstitution, functional characterization and developmental distribution. *Journal of Biochemistry* **144**:  
326 389-392.
- 327 Dolce V, Cappello AR, Capobianco L. 2014. Mitochondrial tricarboxylate and dicarboxylate-tricarboxylate carriers:  
328 from animals to plants. *IUBMB Life* **66**: 462-471.
- 329 Fan J, Teng X, Liu L, Mattaini KR, Looper RE, Vander Heiden MG, Rabinowitz JD. 2015. Human phosphoglycerate  
330 dehydrogenase produces the oncometabolite D-2-hydroxyglutarate. *ACS chemical biology* **10**: 510-516.
- 331 Intlekofer AM, Dematteo RG, Venneti S, Finley LW, Lu C, Judkins AR, Rustenburg AS, Grinaway PB, Chodera JD, Cross  
332 JR et al. 2015. Hypoxia Induces Production of L-2-Hydroxyglutarate. *Cell Metabolism*.
- 333 Intlekofer AM, Wang B, Liu H, Shah H, Carmona-Fontaine C, Rustenburg AS, Salah S, Gunner MR, Chodera JD, Cross



- 334 JR et al. 2017. L-2-Hydroxyglutarate production arises from noncanonical enzyme function at acidic pH.  
335 *Nature chemical biology* **13**: 494-500.
- 336 Jiang L, Boufersaoui A, Yang C, Ko B, Rakheja D, Guevara G, Hu Z, DeBerardinis RJ. 2017. Quantitative metabolic flux  
337 analysis reveals an unconventional pathway of fatty acid synthesis in cancer cells deficient for the  
338 mitochondrial citrate transport protein. *Metabolic engineering* **43**: 198-207.
- 339 Kemp RG, Foe LG. 1983. Allosteric regulatory properties of muscle phosphofructokinase. *Molecular and cellular*  
340 *biochemistry* **57**: 147-154.
- 341 Kim D, Langmead B, Salzberg SL. 2015. HISAT: a fast spliced aligner with low memory requirements. *Nat Methods*  
342 **12**: 357-360.
- 343 Kranendijk M, Struys EA, Salomons GS, Van der Knaap MS, Jakobs C. 2012. Progress in understanding  
344 2-hydroxyglutaric acidurias. *J Inherit Metab Dis* **35**: 571-587.
- 345 Li H, Chawla G, Hurlburt AJ, Sterrett MC, Zaslaver O, Cox J, Karty JA, Rosebrock AP, Caudy AA, Tennessen JM. 2017.  
346 *Drosophila* larvae synthesize the putative oncometabolite L-2-hydroxyglutarate during normal  
347 developmental growth. *Proceedings of the National Academy of Sciences of the United States of America*  
348 **114**: 1353-1358.
- 349 Li H, Tennessen JM. 2017. Methods for studying the metabolic basis of *Drosophila* development. *Wiley Interdiscip*  
350 *Rev Dev Biol* **6**: e280.
- 351 Lommen A. 2009. MetAlign: Interface-Driven, Versatile Metabolomics Tool for Hyphenated Full-Scan Mass  
352 Spectrometry Data Preprocessing. *Analytical Chemistry* **81**: 3079-3086.
- 353 Losman JA, Kaelin WG, Jr. 2013. What a difference a hydroxyl makes: mutant IDH, (R)-2-hydroxyglutarate, and  
354 cancer. *Genes & Dev* **27**: 836-852.
- 355 Love MI, Huber W, Anders S. 2014. Moderated estimation of fold change and dispersion for RNA-seq data with  
356 DESeq2. *Genome Biol* **15**: 550.
- 357 Martin M. 2011. Cutadapt removes adapter sequences from high-throughput sequencing reads. *EMBnetjournal* **17**:  
358 10-12.
- 359 Morciano P, Carrisi C, Capobianco L, Mannini L, Burgio G, Cestra G, De Benedetto GE, Corona DF, Musio A, Cenci G.  
360 2009. A conserved role for the mitochondrial citrate transporter Sea/SLC25A1 in the maintenance of  
361 chromosome integrity. *Hum Mol Genet* **18**: 4180-4188.
- 362 Muhlhausen C, Salomons GS, Lukacs Z, Struys EA, van der Knaap MS, Ullrich K, Santer R. 2014. Combined  
363 D2-/L2-hydroxyglutaric aciduria (SLC25A1 deficiency): clinical course and effects of citrate treatment. *J*  
364 *Inherit Metab Dis* **37**: 775-781.
- 365 Mullen AR, Wheaton WW, Jin ES, Chen PH, Sullivan LB, Cheng T, Yang Y, Linehan WM, Chandel NS, DeBerardinis RJ.  
366 2011. Reductive carboxylation supports growth in tumour cells with defective mitochondria. *Nature* **481**:  
367 385-388.
- 368 Muntau AC, Röschinger W, Merckenschlager A, Van Der Knaap M, Jakobs C, Duran M, Hoffmann G, Roscher A. 2000.  
369 Combined D-2-and L-2-hydroxyglutaric aciduria with neonatal onset encephalopathy: a third biochemical  
370 variant of 2-hydroxyglutaric aciduria? *Neuropediatrics* **31**: 137-140.
- 371 Nadtochiy SM, Schafer X, Fu D, Nehrke K, Munger J, Brookes PS. 2016. Acidic pH Is a Metabolic Switch for  
372 2-Hydroxyglutarate Generation and Signaling. *The Journal of biological chemistry* **291**: 20188-20197.
- 373 Nota B, Struys EA, Pop A, Jansen EE, Ojeda MRF, Kanhai WA, Kranendijk M, van Dooren SJM, Bevova MR,  
374 Sistermans EA et al. 2013. Deficiency in SLC25A1, Encoding the Mitochondrial Citrate Carrier, Causes

375 Combined D-2-and L-2-Hydroxyglutaric Aciduria. *American Journal of Human Genetics* **92**: 627-631.

376 Oldham WM, Clish CB, Yang Y, Loscalzo J. 2015. Hypoxia-Mediated Increases in L-2-hydroxyglutarate Coordinate the  
377 Metabolic Response to Reductive Stress. *Cell Metab.*

378 Palmieri F. 2004. The mitochondrial transporter family (SLC25): physiological and pathological implications. *Pflugers*  
379 *Arch* **447**: 689-709.

380 -. 2013. The mitochondrial transporter family SLC25: identification, properties and physiopathology. *Molecular*  
381 *aspects of medicine* **34**: 465-484.

382 Pogson CI, Randle PJ. 1966. The control of rat-heart phosphofructokinase by citrate and other regulators. *The*  
383 *Biochemical journal* **100**: 683-693.

384 Prasun P, Young S, Salomons G, Werneke A, Jiang YH, Struys E, Paige M, Avantagegiati ML, McDonald M. 2015.  
385 Expanding the Clinical Spectrum of Mitochondrial Citrate Carrier (SLC25A1) Deficiency: Facial  
386 Dysmorphism in Siblings with Epileptic Encephalopathy and Combined D,L-2-Hydroxyglutaric Aciduria.  
387 *JIMD Rep* **19**: 111-115.

388 Reinecke CJ, Koekemoer G, van der Westhuizen FH, Louw R, Lindequie JZ, Mienie LJ, Smuts I. 2012. Metabolomics  
389 of urinary organic acids in respiratory chain deficiencies in children. *Metabolomics* **8**: 264-283.

390 Rzem R, Veiga-da-Cunha M, Noel G, Goffette S, Nassogne MC, Tabarki B, Scholler C, Marquardt T, Vikkula M, Van  
391 Schaftingen E. 2004. A gene encoding a putative FAD-dependent L-2-hydroxyglutarate dehydrogenase is  
392 mutated in L-2-hydroxyglutaric aciduria. *Proc Natl Acad Sci U S A* **101**: 16849-16854.

393 Struys EA, Salomons GS, Achouri Y, Van Schaftingen E, Grosso S, Craigen WJ, Verhoeven NM, Jakobs C. 2005a.  
394 Mutations in the D-2-hydroxyglutarate dehydrogenase gene cause D-2-hydroxyglutaric aciduria. *Am J Hum*  
395 *Genet* **76**: 358-360.

396 Struys EA, Verhoeven NM, Ten Brink HJ, Wickenhagen WV, Gibson KM, Jakobs C. 2005b. Kinetic characterization of  
397 human hydroxyacid-oxoacid transhydrogenase: relevance to D-2-hydroxyglutaric and  
398 gamma-hydroxybutyric acidurias. *J Inherit Metab Dis* **28**: 921-930.

399 Teng X, Emmett MJ, Lazar MA, Goldberg E, Rabinowitz JD. 2016. Lactate Dehydrogenase C Produces  
400 S-2-Hydroxyglutarate in Mouse Testis. *ACS chemical biology* **11**: 2420-2427.

401 Tornheim K, Lowenstein JM. 1976. Control of phosphofructokinase from rat skeletal muscle. Effects of fructose  
402 diphosphate, AMP, ATP, and citrate. *The Journal of biological chemistry* **251**: 7322-7328.

403 Tyrakis PA, Palazon A, Macias D, Lee KL, Phan AT, Velica P, You J, Chia GS, Sim J, Doedens A et al. 2016.  
404 S-2-hydroxyglutarate regulates CD8+ T-lymphocyte fate. *Nature*.

405 Usenik A, Legiša M. 2010. Evolution of allosteric citrate binding sites on 6-phosphofructo-1-kinase. *PLoS One* **5**:  
406 e15447.

407 Xia J, Wishart DS. 2016. Using MetaboAnalyst 3.0 for Comprehensive Metabolomics Data Analysis. *Current*  
408 *protocols in bioinformatics* **55**: 14.10.11-14.10.91.

409 Ye D, Guan KL, Xiong Y. 2018. Metabolism, Activity, and Targeting of D- and L-2-Hydroxyglutarates. *Trends Cancer* **4**:  
410 151-165.

411

412

413 **Figure legends**

414 **Figure 1.** *sea* mutant larvae accumulate excess L-2HG. (A) L- and D-2HG in larvae were  
415 detected separately using a chiral derivatization method coupled with GC-MS. (B) Relative  
416 abundance of L-2HG and D-2HG in *sea* mutant and control larvae. (C) The PCA scores plots of  
417 GC-MS spectra show that the metabolic profile of *sea*<sup>A24</sup>/*Df* mutants is significantly different  
418 than that of the *sea*<sup>prec</sup>/*Df* control. (D) Targeted analysis of the GC-MS data analyzed in panel (C)  
419 reveals that *sea*<sup>A24</sup>/*Df* mutants display significant changes in pyruvate (pyr), lactate (lac),  
420 2-hydroxyglutarate (2HG) and citrate (cit). For all panels, data are shown as mean ± SEM, *n* = 6,  
421 \**P* < 0.05, \*\**P* < 0.01.

422

423 **Figure 2.** *sea* mutants exhibit elevated levels of glycolytic flux. The relative metabolic flux rates  
424 from <sup>13</sup>C<sub>6</sub>-glucose into pyruvate (pyr; m+3), lactate (lac; m+3), 2HG (m+2), and citrate (cit;  
425 m+2). Data are shown as mean ± SEM, *n* = 4, \**P* < 0.05, \*\**P* < 0.01.

426

427 **Figure 3.** L-2HG levels in *sea* mutants are dependent on PFK activity. (A) *sea*<sup>A24</sup>/*Df* mutant  
428 larvae fed a semi-defined diet supplemented with 10 mM citrate accumulated excess citrate (cit)  
429 and displayed significant decreases in pyruvate (pyr), lactate (lac) and 2HG. (B) *Pfk-RNAi*  
430 reduces 2HG levels in *sea* mutant larvae. Data are shown as mean ± SEM, *n* = 6, \**P* < 0.05, \*\**P*  
431 < 0.01, \*\*\**P* < 0.001.

432

433 **Figure 4.** *sea* mutants accumulate excess L-2HG due to decreased degradation. (A) The relative

434 abundance of pyruvate (pyr), lactate (lac), 2HG, and citrate (cit) in *dL2HGDH*<sup>12/14</sup> single mutants  
435 compared with *dL2HGDH*<sup>12/14</sup>; *sea*<sup>Δ24</sup>/*Df* double mutants. Note that 2HG levels are similar in  
436 both strains. **(B)** Lactate and 2HG levels are highly correlated in individual larval samples. **(C)**  
437 Relative *dLdh* mRNA levels in *sea*<sup>Δ24</sup>/*Df* mutant larvae that ubiquitously express a  
438 *UAS-dLdh-RNAi* transgene. Data are shown as mean ± SEM, *n* = 3, \*\*\**P* < 0.001. **(D)** The  
439 relative abundance of lactate and 2HG in *sea*<sup>Δ24</sup>/*Df* mutant larvae that express the same  
440 *UAS-dLdh-RNAi* transgene used in panel (C). For **(A)** and **(D)**, data are shown as mean ± SEM, *n*  
441 = 6, \**P* < 0.05, \*\**P* < 0.01, \*\*\**P* < 0.001.

442

443 **Figure 5.** The effects of pH on the dLDH catalyzed formation of L-2HG from 2OG. **(A)** Purified  
444 *Drosophila* LDH was incubated with 2OG, NADH, pH adjusted buffers. The reaction rates were  
445 measured by changes in NADH concentration (absorbance at 340 nm). **(B)** Relative dLDH  
446 activity at different pH values was calculated based on the slopes in panel A. Data are shown as  
447 mean ± SD, *n* = 3, \*\**P* < 0.01.

448

## Li\_Fig1.

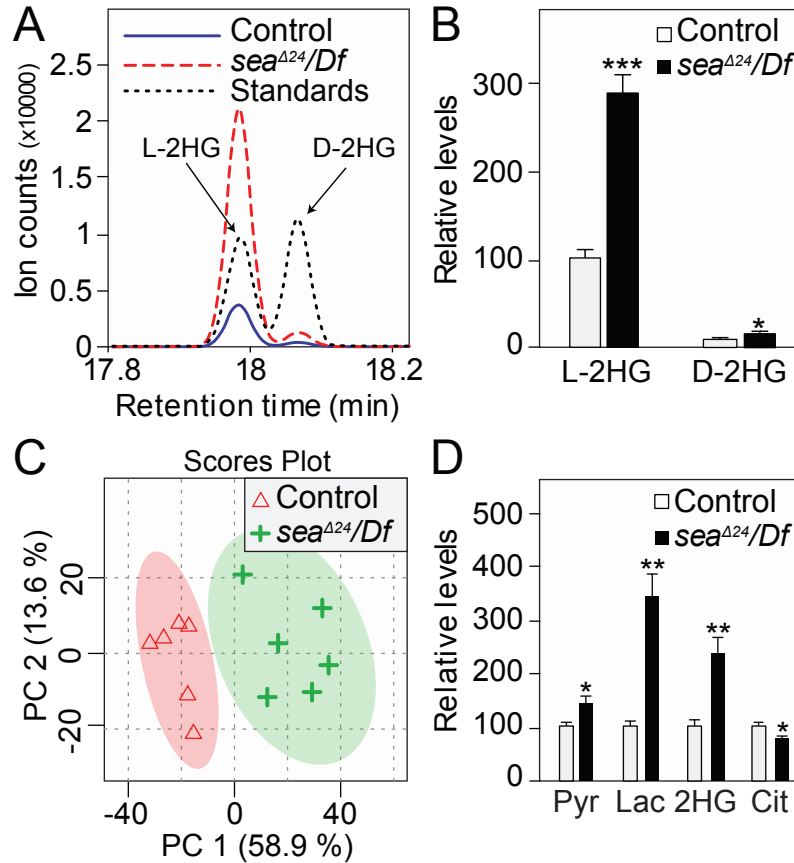

**Figure 1.** *sea* mutant larvae accumulate excess L-2HG. (A) L- and D-2HG in larvae were detected separately using a chiral derivatization method coupled with GC-MS. (B) Relative abundance of L-2HG and D-2HG in *sea* mutant and control larvae. (C) The PCA scores plots of GC-MS spectra show that the metabolic profile of *sea*<sup>Δ24</sup>/*Df* mutants is significantly different than that of the *sea*<sup>prec</sup>/*Df* control. (D) Targeted analysis of the GC-MS data analyzed in panel (C) reveals that *sea*<sup>Δ24</sup>/*Df* mutants display significant changes in pyruvate (pyr), lactate (lac), 2-hydroxyglutarate (2HG) and citrate (cit). For all panels, data are shown as mean ± SEM, *n* = 6, \**P* < 0.05, \*\**P* < 0.01.

## Li\_Fig2.

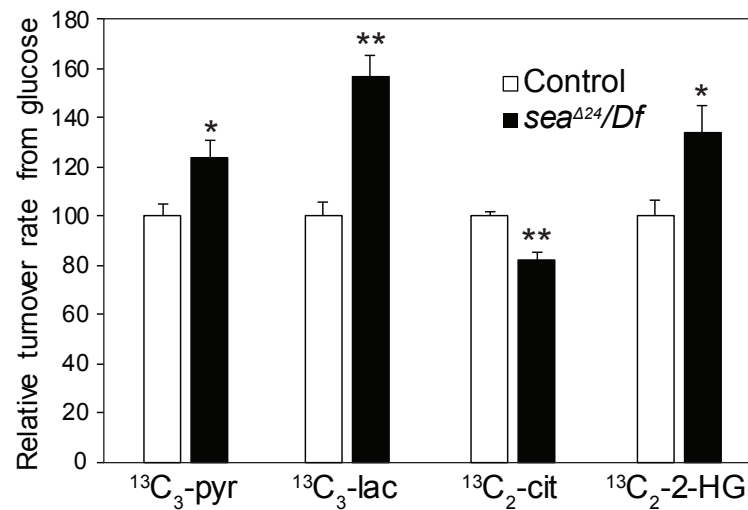

**Figure 2.** *sea* mutants exhibit elevated levels of glycolytic flux. The relative metabolic flux rates from <sup>13</sup>C<sub>6</sub>-glucose into pyruvate (pyr; m+3), lactate (lac; m+3), 2HG (m+2), and citrate (cit; m+2). Data are shown as mean ± SEM, *n* = 4, \**P* < 0.05, \*\**P* < 0.01.

## Li\_Fig3.

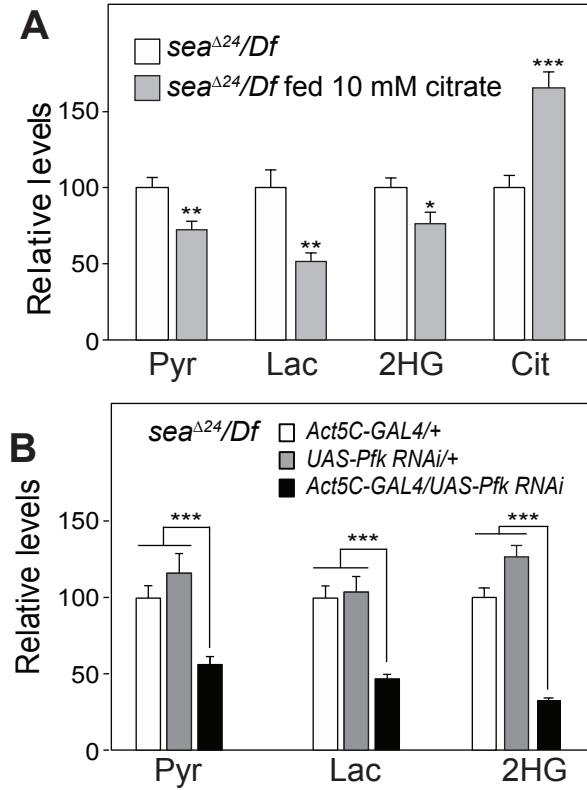

**Figure 3.** L-2HG levels in *sea* mutants are dependent on PFK activity. (A) *sea*<sup>Δ24</sup>/*Df* mutant larvae fed a semi-defined diet supplemented with 10 mM citrate accumulated excess citrate (cit) and displayed significant decreases in pyruvate (pyr), lactate (lac) and 2HG. (B) *Pfk-RNAi* reduces 2HG levels in *sea* mutant larvae. Data are shown as mean ± SEM, *n* = 6, \**P* < 0.05, \*\**P* < 0.01, \*\*\**P* < 0.001.

## Li\_Fig4.

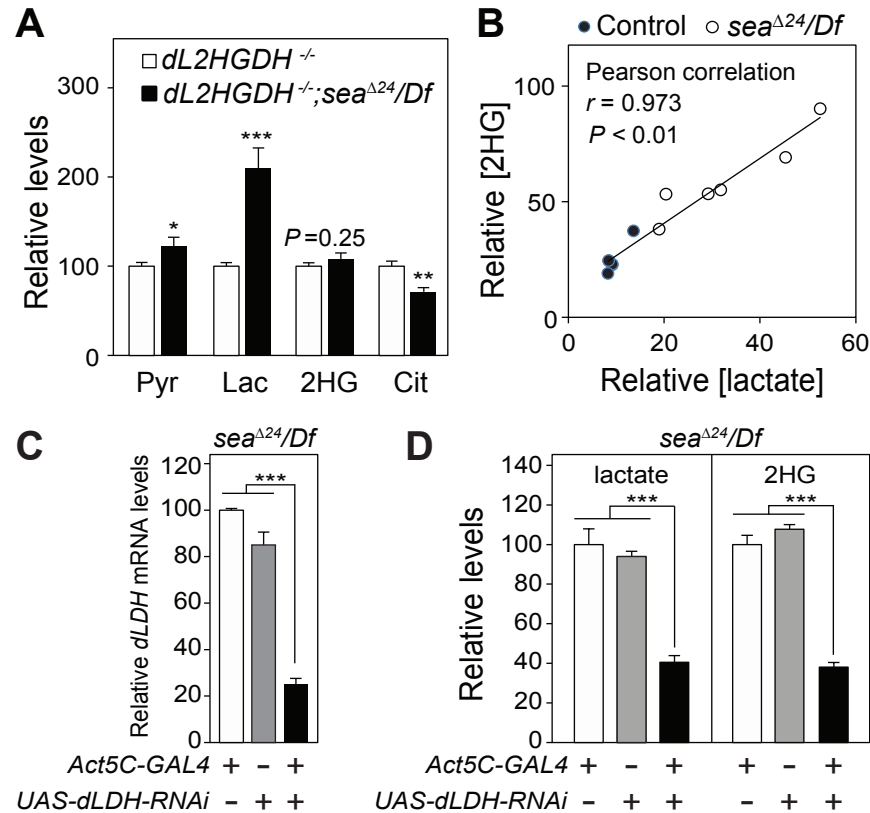

**Figure 4.** *sea* mutants accumulate excess L-2HG due to decreased degradation. **(A)** The relative abundance of pyruvate (pyr), lactate (lac), 2HG, and citrate (cit) in *dL2HGDH*<sup>12/14</sup> single mutants compared with *dL2HGDH*<sup>12/14</sup>; *sea*<sup>Δ24</sup>/*Df* double mutants. Note that 2HG levels are similar in both strains. **(B)** Lactate and 2HG levels are highly correlated in individual larval samples. **(C)** Relative *dLdh* mRNA levels in *sea*<sup>Δ24</sup>/*Df* mutant larvae that ubiquitously express a *UAS-dLdh-RNAi* transgene. Data are shown as mean ± SEM,  $n = 3$ , \*\*\* $P < 0.001$ . **(D)** The relative abundance of lactate and 2HG in *sea*<sup>Δ24</sup>/*Df* mutant larvae that express the same *UAS-dLdh-RNAi* transgene used in panel (C). For (A) and (D), data are shown as mean ± SEM,  $n = 6$ , \* $P < 0.05$ , \*\* $P < 0.01$ , \*\*\* $P < 0.001$ .



## Li\_Fig5.

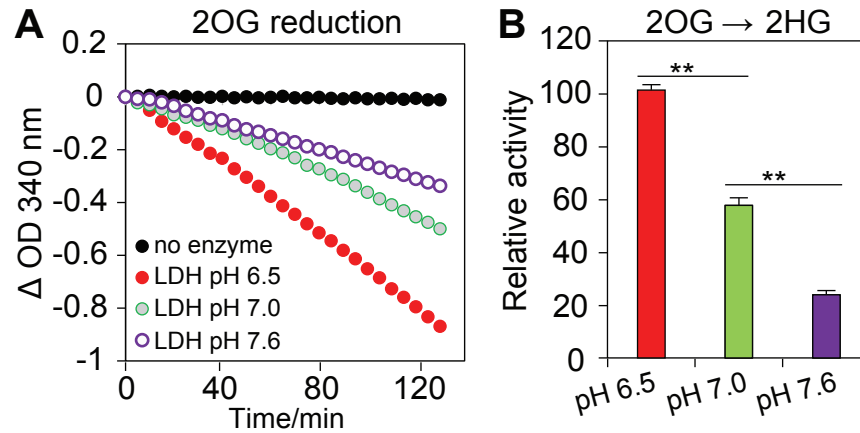

**Figure 5.** The effects of pH on the dLDH catalyzed formation of L-2HG from 2OG. **(A)** Purified *Drosophila* LDH was incubated with 2OG, NADH, pH adjusted buffers. The reaction rates were measured by changes in NADH concentration (absorbance at 340 nm). **(B)** Relative dLDH activity at different pH values was calculated based on the slopes in panel A. Data are shown as mean  $\pm$  SD,  $n = 3$ ,  $**P < 0.01$ .

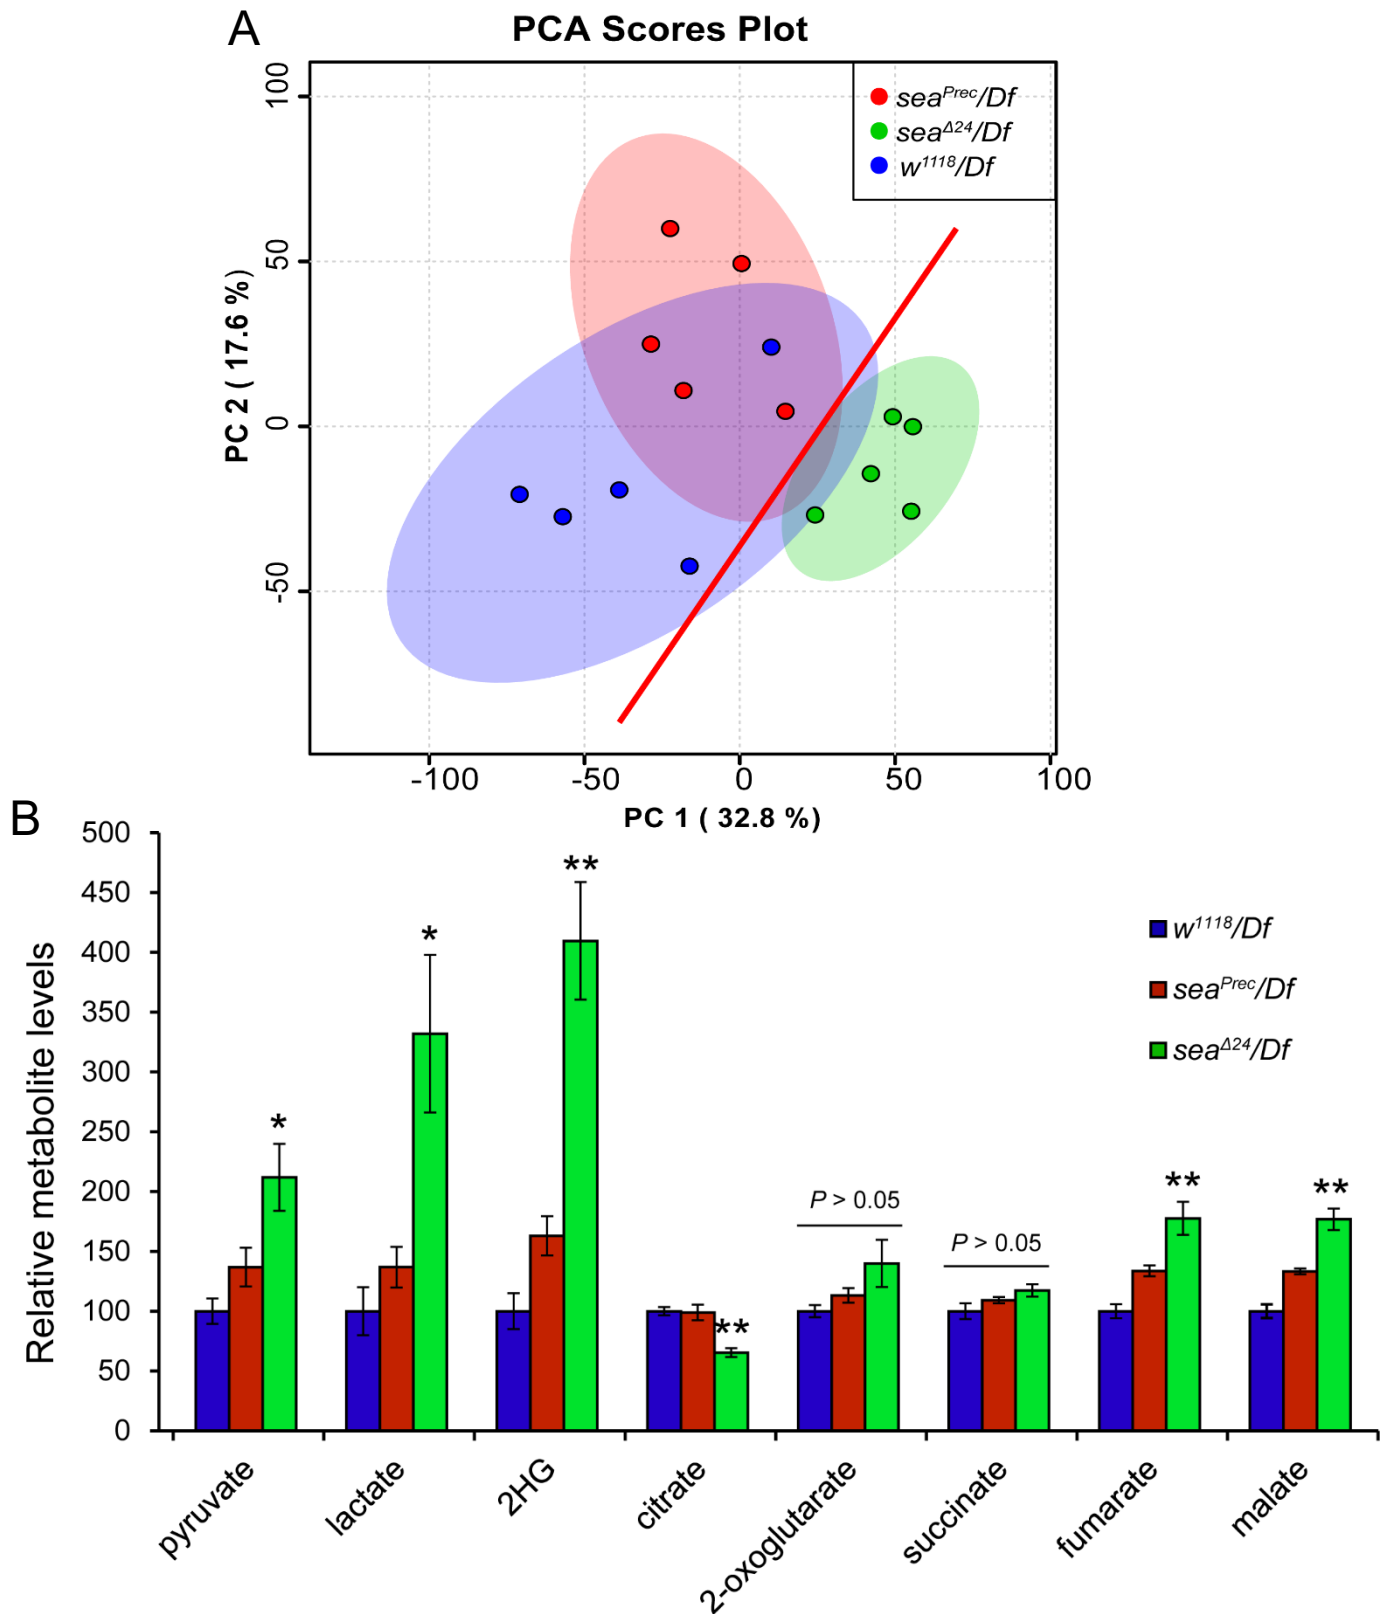

**Supplemental Figure S1.** The metabolic changes caused by *sea* deficiency in *Drosophila* larvae. (A) PCA scores plots of metabolic profiles of *sea* mutants (*sea*<sup>Δ24</sup>/*Df*) and two control strains (*sea*<sup>Prec</sup>/*Df* and *w*<sup>1118</sup>/*Df*). (B) A comparison of relative metabolite levels between *sea* mutant larvae and the controls. *Df* refers to the molecularly-defined deficiency *Df*(3*R*)*Exel8153*, which uncovers the *sea* gene. Data shown as mean ± SEM, *n* = 5, \**P* < 0.05, \*\**P* < 0.01.

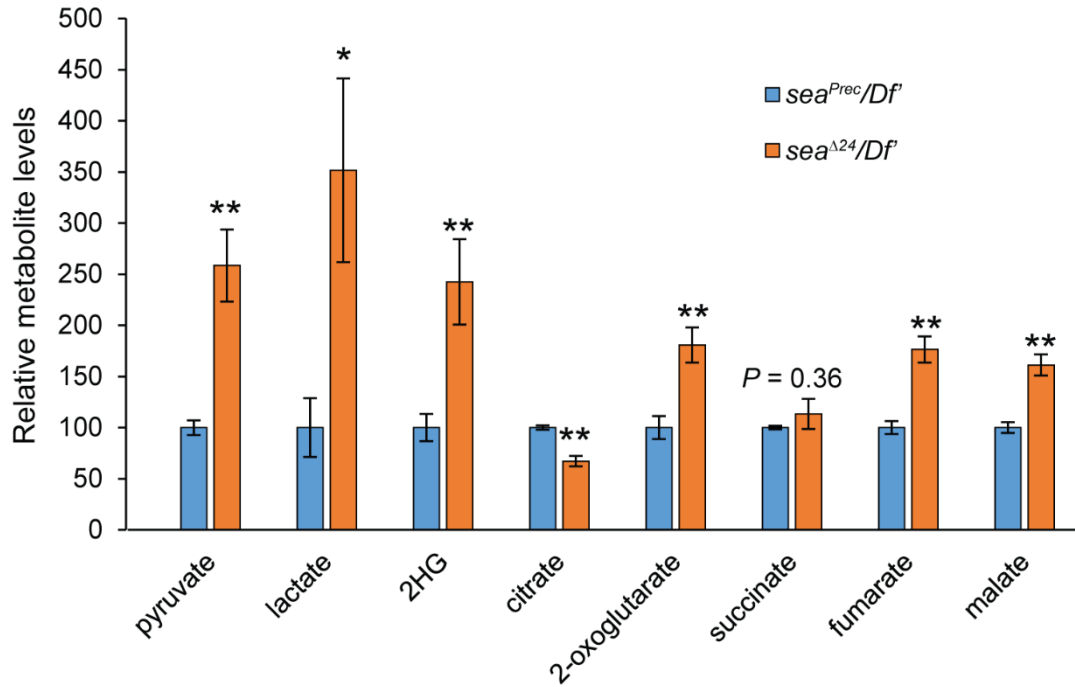

**Supplemental Figure S2.** Metabolic defects induced by the *sea<sup>Δ24</sup>* mutation were confirmed using a different deficiency strain *Df(3R)BSC469 (Df)*. Data are shown as mean  $\pm$  SEM.  $n = 6$ , \* $P < 0.05$ , \*\* $P < 0.01$ .

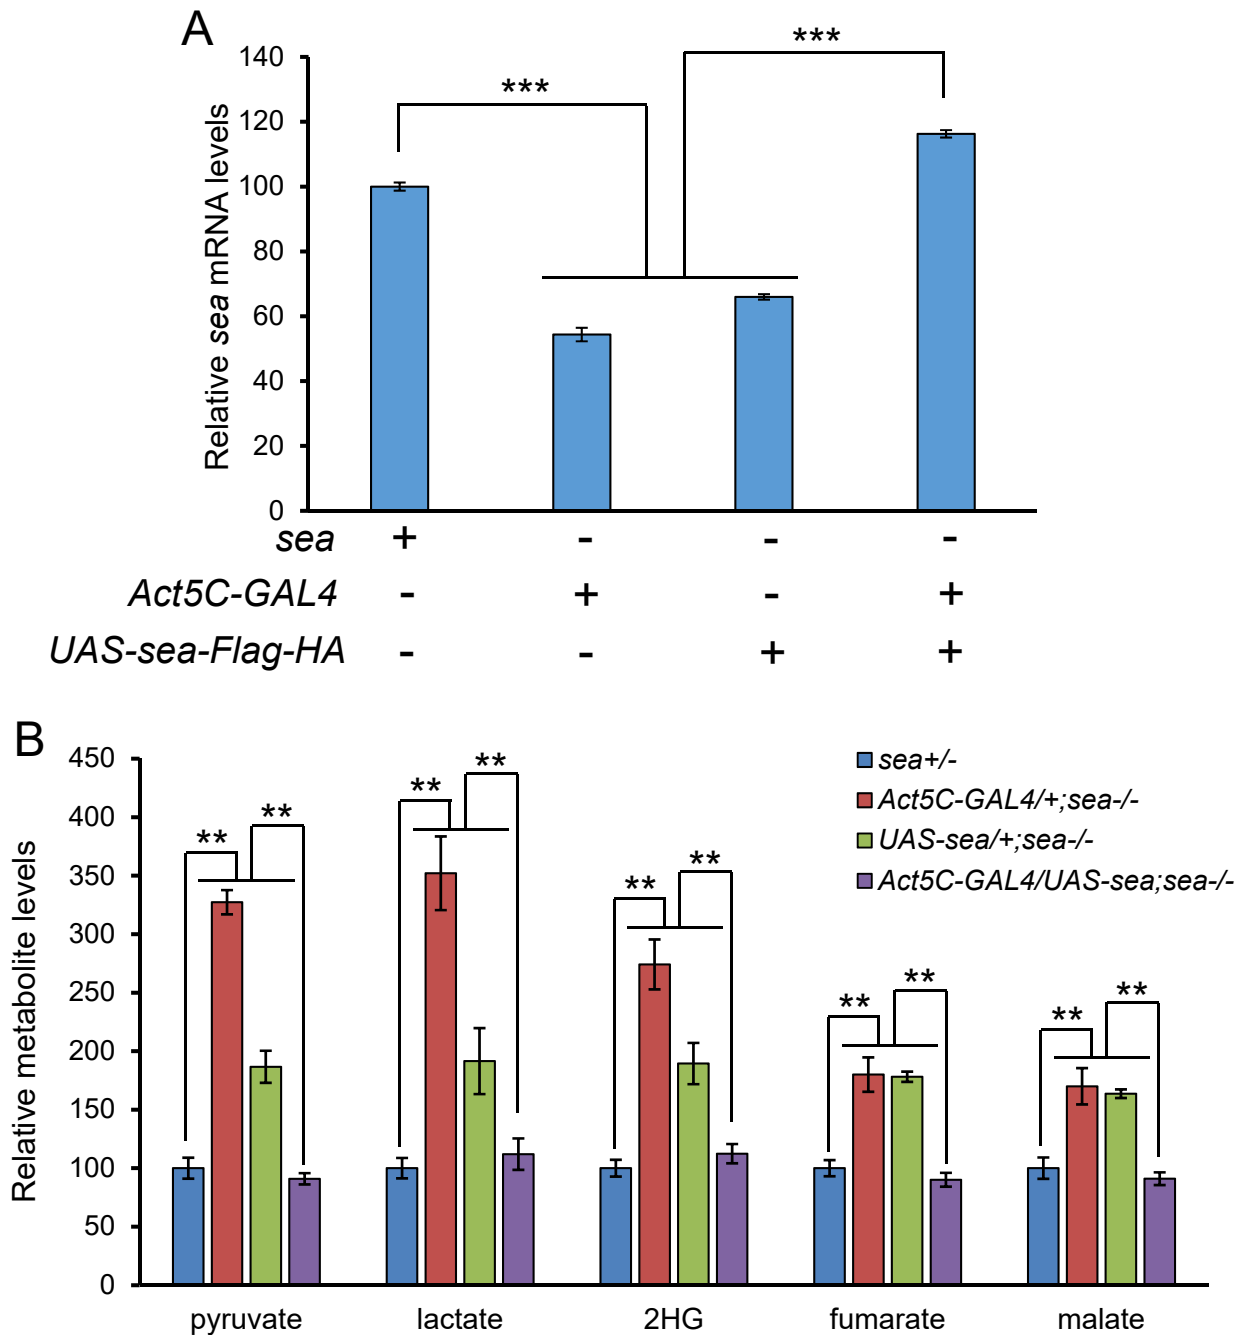

**Supplemental Figure S3.** *GAL4*-driven expression of *UAS-sea-Flag-HA* rescued the phenotypes caused by the *sea* mutation. (A) Relative *sea* mRNA levels in indicated genotypes. Data shown as mean  $\pm$  SEM,  $n = 4$ , \*\*\* $P < 0.001$ . (B) Relative metabolite levels in indicated genotypes. Data shown as mean  $\pm$  SEM,  $n = 6$ , \*\* $P < 0.01$ .

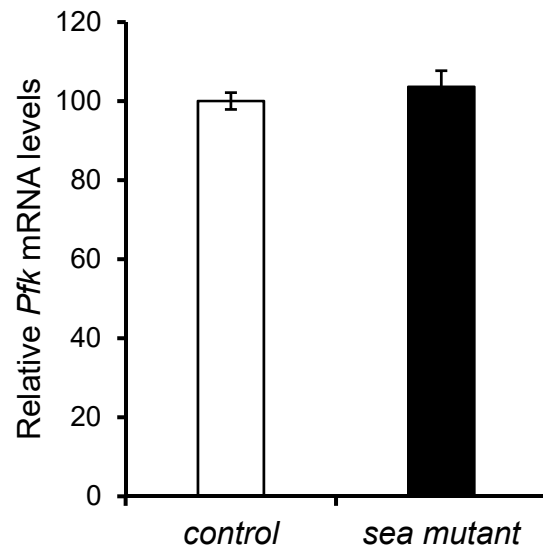

**Supplemental Figure S4.** A comparison of *Pfk* mRNA levels between the *sea* mutant (*sea*<sup>Δ24</sup>/*Df*) and control (*sea*<sup>Pre</sup>/*Df*). Data shown as mean ± SEM, *n* = 3, *P* > 0.05.

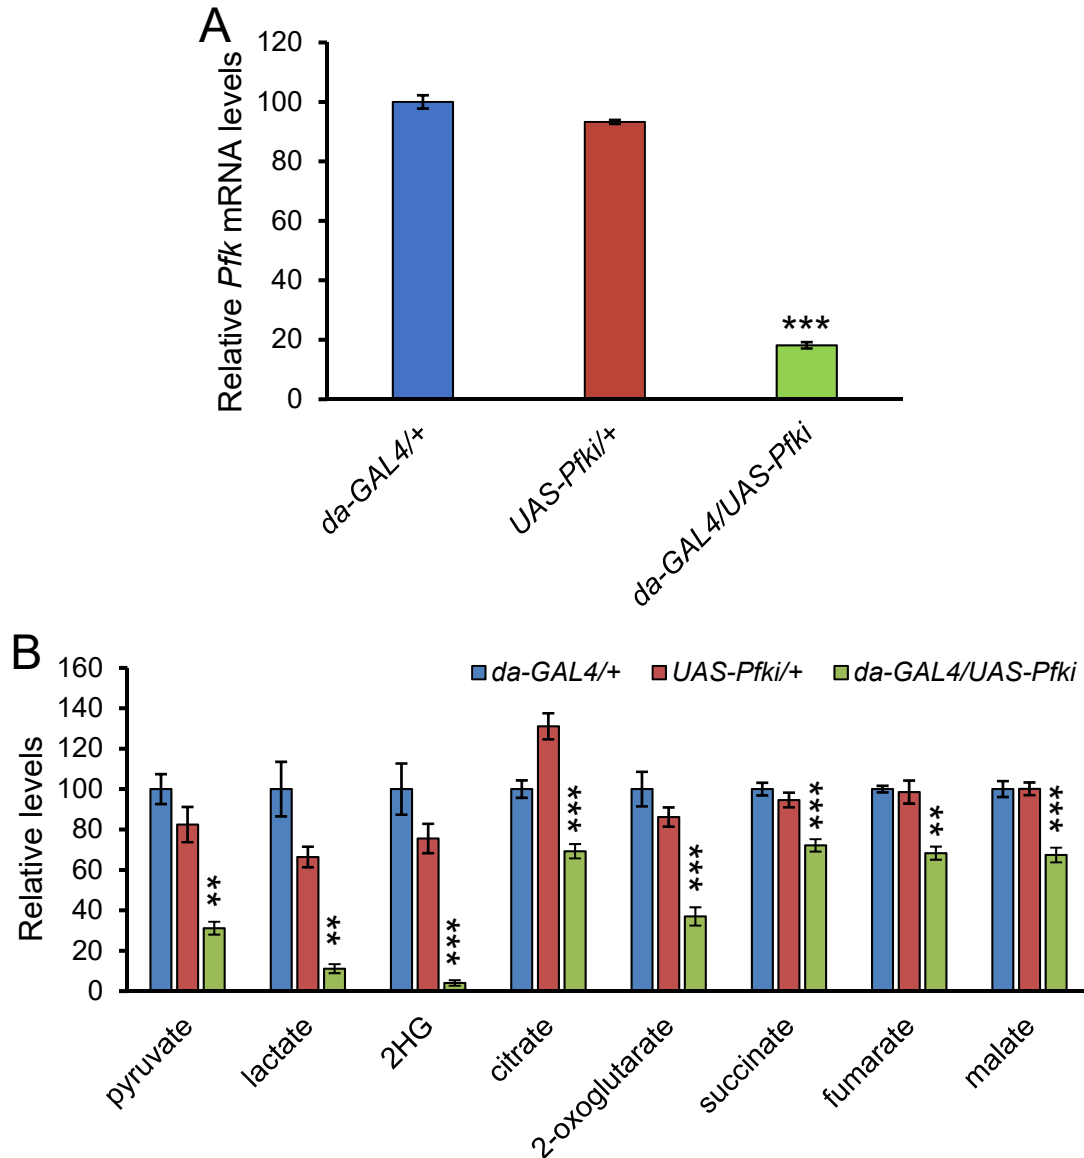

**Supplemental Figure S5.** Changed metabolic profiles caused by *Pfk* knockdown. (A) Expression of dsRNA for RNAi of *Pfk* (*Pfki*) down-regulates the transcriptional levels of *Pfk* significantly. Data shown as mean  $\pm$  SEM,  $n = 3$ ,  $***P < 0.001$ . (B) Changed metabolites induced by *Pfk* knockdown. Data shown as mean  $\pm$  SEM,  $n = 6$ ,  $**P < 0.01$ ,  $***P < 0.001$ .

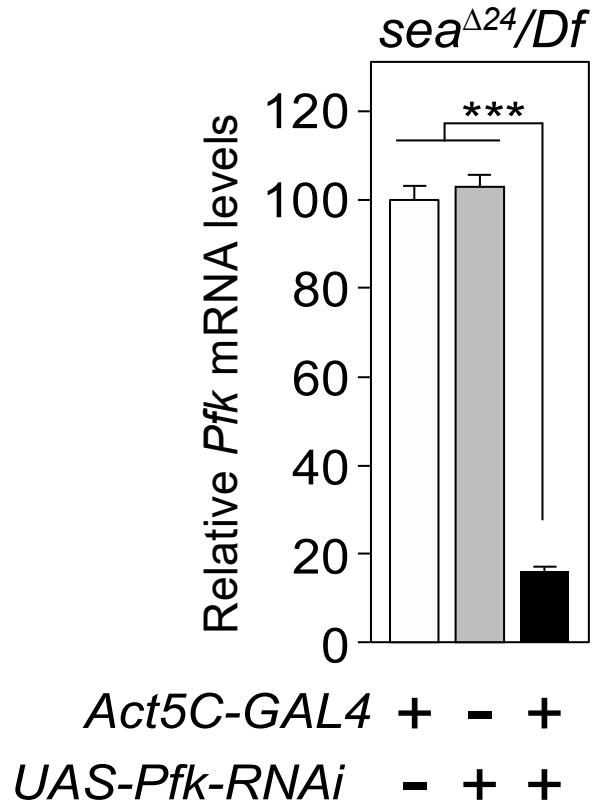

**Supplemental Figure S6.** The relative mRNA levels of *Pfk* in *sea* mutant larvae with indicated genotypes. Data are shown as mean ± SEM,  $n = 3$ , \*\*\* $P < 0.001$ .

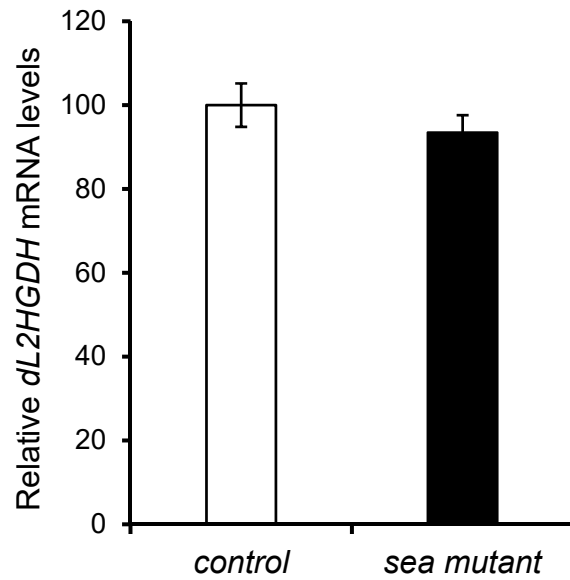

**Supplemental Figure S7.** A comparison of *dL2HGDH* mRNA levels between the *sea* mutant (*sea*<sup>Δ24</sup>/*Df*) and control (*sea*<sup>Pre</sup>/*Df*). Data shown as mean ± SEM, *n* = 3, *P* > 0.05.

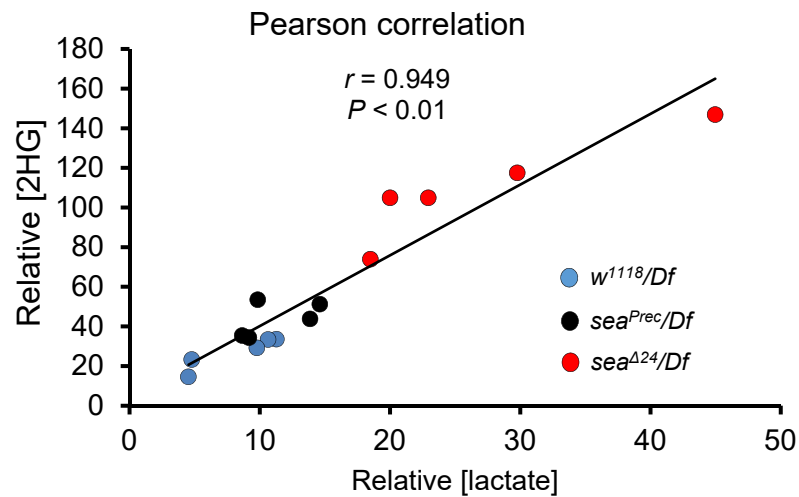

**Supplemental Figure S8.** The correlation between the levels of lactate and 2HG in individual mL3 larval sample from different groups. *sea* mutant (*sea*<sup>Δ24</sup>/*Df*) and its two controls (*sea*<sup>Pre</sup>/*Df* and *w*<sup>118</sup>/*Df*). *Df* refers to the molecularly-defined deficiency *Df*(3*R*)*Exel8153*, which uncovers the *sea* gene.



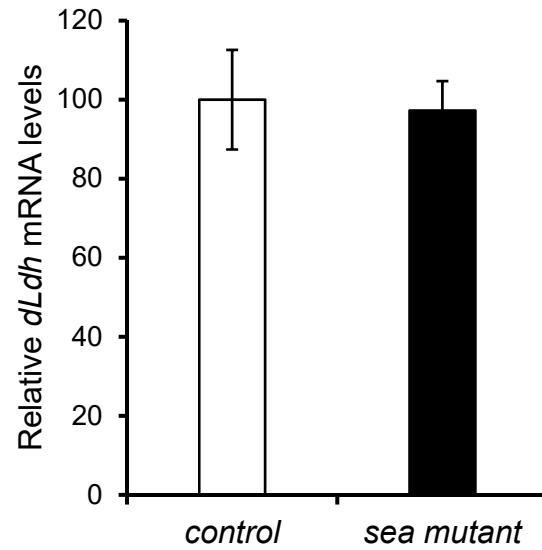

**Supplemental Figure S9.** A comparison of *dLdh* mRNA levels between the *sea* mutant (*sea*<sup>Δ24</sup>/*Df*) and control (*sea*<sup>Pre</sup>/*Df*). Data shown as mean ± SEM, *n* = 3, *P* > 0.05.

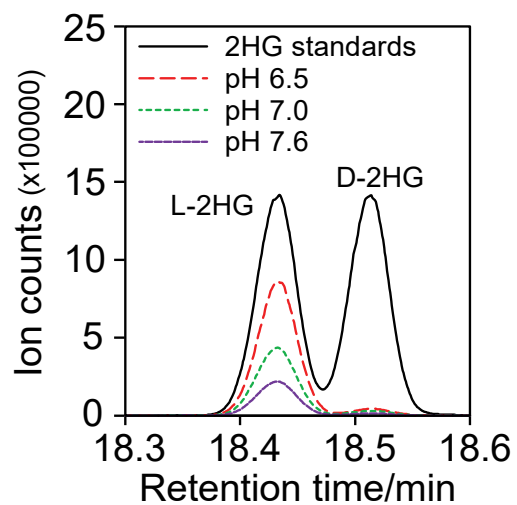

**Supplemental Figure S10.** The products of each reaction were detected by GC-MS with chiral derivatization to confirm that the dominant product is L-2HG.

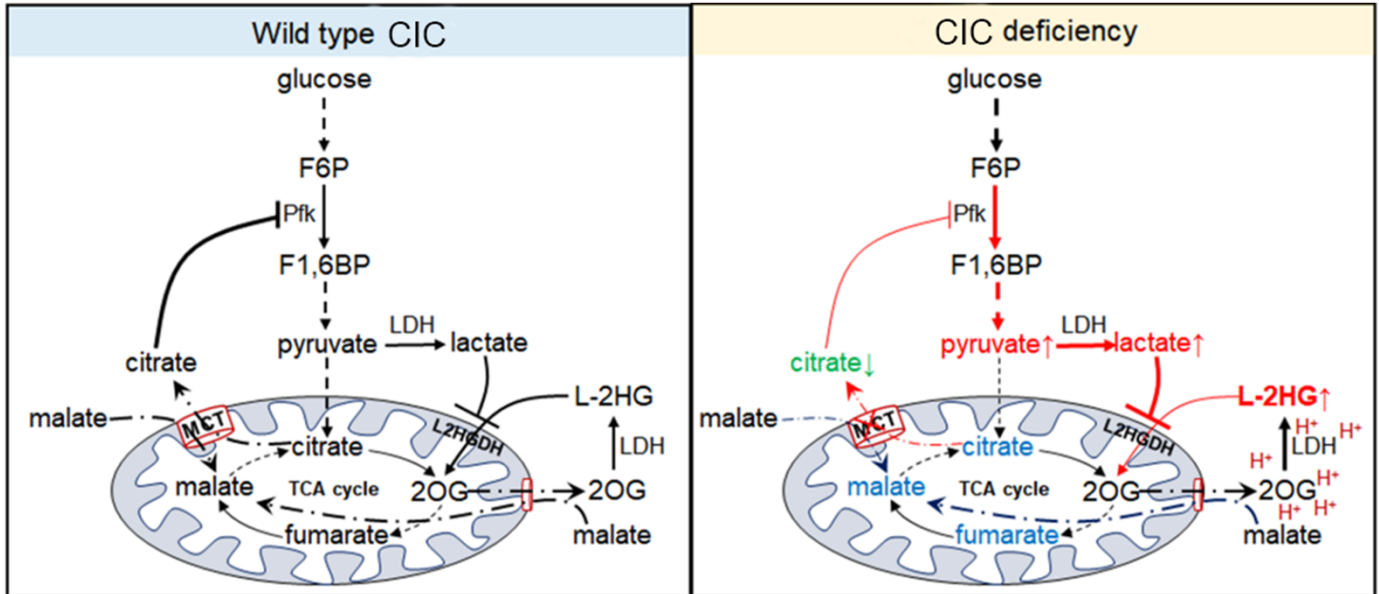

**Supplemental Figure S11.** Schematic summary illustrating the mechanism by which mitochondrial citrate transporter (CIC) affects the accumulation of L-2HG.

Supplemental Table S2. The expression of genes encoding glycolytic enzymes were compared between se

| <b>Enzyme Function</b>                         | <b>FBgn</b> | <b>Gene</b>  | <b>Base Mean</b> |
|------------------------------------------------|-------------|--------------|------------------|
| hexokinase (best match to human hexokinase IV) | FBgn0001186 | Hex-A        | 16053.9055       |
| hexokinase                                     | FBgn0001187 | Hex-C        | 3978.6868        |
| hexokinase                                     | FBgn0042710 | Hex-t2       | 135.551903       |
| hexokinase                                     | FBgn0042711 | Hex-t1       | 18.6612123       |
| phosphoglucose isomerase                       | FBgn0003074 | Pgi          | 68381.3879       |
| Phosphofructokinase                            | FBgn0003071 | Pfk          | 36224.9971       |
| aldolase                                       | FBgn0000064 | Ald          | 264899.634       |
| aldolase                                       | FBgn0039425 | CG5432       | 142.641361       |
| triose phosphate isomerase                     | FBgn0086355 | Tpi          | 52056.7575       |
| glycerol 3 phosphate dehydrogenase             | FBgn0001128 | Gpdh         | 75417.8956       |
| glyceraldehyde phosphate dehydrogenase         | FBgn0001091 | Gapdh1       | 161678.953       |
| glyceraldehyde phosphate dehydrogenase         | FBgn0001092 | Gapdh2       | 257663.529       |
| glyceraldehyde 3-phosphate dehydrogenase       | FBgn0034173 | CG9010       | 89.5456135       |
| phosphoglycerate kinase                        | FBgn0250906 | Pgk          | 45043.1381       |
| phosphoglycerate kinase                        | FBgn0031451 | CG9961       | 149.983451       |
| phosphoglycerate mutase                        | FBgn0014869 | Pglym78      | 55187.6462       |
| phosphoglycerate mutase                        | FBgn0011270 | Pglym87      | 65.5693506       |
| phosphoglycerate mutase                        | FBgn0038957 | CG7059       | 190.487025       |
| enolase                                        | FBgn0000579 | Eno          | 183715.725       |
| pyruvate kinase                                | FBgn0267385 | PyK          | 77869.845        |
| pyruvate kinase                                | FBgn0038258 | CG7362       | 16.1795929       |
| pyruvate kinase                                | FBgn0038952 | CG7069       | 265.137004       |
| pyruvate kinase                                | FBgn0031462 | CG2964       | 64.1806881       |
| pyruvate kinase                                | FBgn0036723 | CG12229      | 123.000086       |
| L-lactate dehydrogenase                        | FBgn0001258 | dLdh (ImpL3) | 36449.7937       |
| L-lactate dehydrogenase                        | FBgn0033856 | CG13334      | 11.7465735       |

*a[24]/Df* mutants and *sea[prec]/Df* controls. Data derived from Supplemental Table S1.

| log2 Fold Change | Adj. pvalue | C1         | C2         | C3         | S1         | S2         |
|------------------|-------------|------------|------------|------------|------------|------------|
| 0.253696585      | 0.00778946  | 15012.994  | 15092.9436 | 13832.9756 | 17121.6912 | 19123.5513 |
| 0.872410777      | 3.2301E-17  | 2889.93847 | 2725.51689 | 2817.52654 | 5470.20739 | 4504.23521 |
| -1.729302381     | 0.00576783  | 219.285272 | 203.498449 | 202.707079 | 91.7820033 | 81.6830219 |
| -1.474911387     | 0.12826018  | 33.1945596 | 17.8806169 | 31.5774847 | 12.5596426 | 15.5586708 |
| -0.03221151      | 0.76081911  | 67100.2874 | 70343.1982 | 69987.9297 | 66521.6637 | 66129.2131 |
| -0.052785462     | 0.62601693  | 36943.533  | 35739.0958 | 37978.5464 | 32994.181  | 35264.6999 |
| -0.256211007     | 0.01078449  | 288390.31  | 270970.531 | 305717.928 | 222156.89  | 237776.359 |
| -1.568536847     | 0.01547101  | 265.556477 | 159.222636 | 215.94925  | 103.375519 | 91.4071912 |
| 0.518097535      | 0.00105756  | 43143.8744 | 44734.749  | 40545.4904 | 51883.8834 | 56379.761  |
| 0.092188272      | 0.40844882  | 71573.5058 | 73249.2242 | 74205.0518 | 84959.219  | 71945.2388 |
| -0.092618061     | 0.42659743  | 165872.208 | 165335.253 | 169390.796 | 143081.38  | 149804.717 |
| -0.004561474     | 0.82612933  | 259528.143 | 250984.259 | 263698.482 | 238121.162 | 256667.503 |
| -1.675314663     | 0.00385912  | 136.801821 | 114.095365 | 158.906052 | 66.6627182 | 47.6484294 |
| 0.1838583        | 0.15604251  | 41779.8798 | 42322.5687 | 42425.8786 | 42844.8052 | 45229.0561 |
| -1.199485062     | 0.00047888  | 219.285272 | 166.0343   | 242.433592 | 118.833541 | 87.5175235 |
| -0.03245939      | 0.70724869  | 55586.8047 | 55005.0348 | 56831.3234 | 49367.1242 | 50487.8869 |
| -2.389610059     | 7.3359E-05  | 122.719281 | 80.8885049 | 127.328567 | 19.322527  | 35.9794263 |
| -0.348319072     | 0.30505717  | 227.332438 | 229.042188 | 184.371766 | 193.22527  | 185.731633 |
| 0.073416727      | 0.62075545  | 171966.931 | 186152.548 | 179004.612 | 169255.675 | 188655.691 |
| -0.067375215     | 0.44664918  | 78039.4037 | 81375.5389 | 79645.5468 | 70544.6138 | 73657.665  |
| -2.948149931     | 0.00041598  | 25.1473936 | 26.3951963 | 34.6333703 | 2.89837905 | 6.80691849 |
| -0.815450539     | 0.01028556  | 407.387777 | 264.803421 | 343.277818 | 223.175187 | 211.014473 |
| -1.487889218     | 0.05352542  | 93.5483043 | 91.9574582 | 98.8069683 | 43.4756858 | 52.5105141 |
| -2.142221376     | 0.00014932  | 215.261689 | 176.251795 | 210.856108 | 42.5095594 | 78.7657711 |
| -0.256217906     | 0.06355449  | 40336.4194 | 39729.0278 | 38966.6161 | 27624.4507 | 33914.9852 |
| -2.036471702     | 0.02561563  | 20.1179149 | 17.0291589 | 19.3539422 | 0.96612635 | 5.83450156 |

| <b>S3</b>  | <b>C Mean</b> | <b>S Mean</b> |
|------------|---------------|---------------|
| 16139.2772 | 14646.3044    | 17461.5065    |
| 5464.69632 | 2810.99397    | 5146.37964    |
| 14.3555945 | 208.496934    | 62.6068732    |
| 1.19629954 | 27.5508871    | 9.77153764    |
| 70206.0351 | 69143.8051    | 67618.9706    |
| 38429.9266 | 36887.0584    | 35562.9358    |
| 264385.788 | 288359.59     | 241439.679    |
| 20.3370923 | 213.576121    | 71.706601     |
| 75652.7869 | 42808.0379    | 61305.4771    |
| 76575.1339 | 73009.2606    | 77826.5305    |
| 176589.365 | 166866.085    | 156491.821    |
| 276981.626 | 258070.295    | 257256.764    |
| 13.159295  | 136.601079    | 42.4901475    |
| 55656.64   | 42176.109     | 47910.1671    |
| 65.796475  | 209.251055    | 90.7158465    |
| 63847.703  | 55807.721     | 54567.5714    |
| 7.17779727 | 110.312118    | 20.8265835    |
| 123.218853 | 213.58213     | 167.391919    |
| 207258.896 | 179041.363    | 188390.087    |
| 83956.3021 | 79686.8298    | 76052.8603    |
| 1.19629954 | 28.7253201    | 3.6338657     |
| 141.163346 | 338.489672    | 191.784335    |
| 4.78519818 | 94.7709102    | 33.590466     |
| 14.3555945 | 200.789864    | 45.2103084    |
| 38127.2628 | 39677.3544    | 33222.2329    |
| 7.17779727 | 18.833672     | 4.65947506    |

Supplemental Table 3. BDSC strains used for genetic a

| <b><u>BDSC Stock Number</u></b> | <b><u>Description in Text</u></b>            |
|---------------------------------|----------------------------------------------|
| 4414                            | <i>Act5C-GAL4</i>                            |
| 7963                            | <i>Df</i> or <i>Df(3R)Exel8153</i>           |
| 8621                            | <i>UAS-sea insertion site</i>                |
| 24973                           | <i>Df<sup>f</sup></i> or <i>Df(3R)BSC469</i> |
| 33640                           | <i>UAS-LDH-RNAi</i>                          |
| 34336                           | <i>UAS-Pfk-RNAi</i>                          |

analysis

**Genotype**

*y[1] w[\*]; P{w[+mC]=Act5C-GAL4}25FO1/CyO, y[+]  
w[1118]; Df(3R)Exel8153/TM6B, Tb[1]  
y[1] w[67c23]; P{y[+t7.7]=CaryP}attP1  
w[1118]; Df(3R)BSC469/TM6C, Sb[1] cu[1]  
y[1] v[1]; P{y[+t7.7] v[+t1.8]=TRiP.HMS00039}attP2  
y[1] sc[\*] v[1]; P{y[+t7.7] v[+t1.8]=TRiP.HMS01324}attP2*



Supplemental Table 4. Oligos used for qRT-PCR analysis

| <b><u>Gene analyzed</u></b> | <b><u>Oligo name</u></b> | <b><u>Oligo Sequence</u></b> |
|-----------------------------|--------------------------|------------------------------|
| <i>dL2HGDH</i>              | <i>dL2HGDH</i> forward   | 5'-CGTACCGGATCTGCGAATGA-3'   |
| <i>dL2HGDH</i>              | <i>dL2HGDH</i> reverse   | 5'-ATCACCACCGCACTGTTTGA-3'   |
| <i>Pfk</i>                  | <i>Pfk</i> forward       | 5'-CGAGCCTGTGTCCGTATGG-3'    |
| <i>Pfk</i>                  | <i>Pfk</i> reverse       | 5'-AGTTGGCTTCCTGGATGCAG-3'   |
| <i>sea</i>                  | <i>sea</i> forward       | 5'-AGGGTGACGATCACACGAAG-3'   |
| <i>sea</i>                  | <i>sea</i> reverse       | 5'-ATGCTTCCAGACCCTGCATC-3'   |
